# Supplementary material
Source: PubMed Central journal article supplement (PMC544304)
Supplement: pnas_102_2_497__4.pdf [file pnas_102_2_497__4.pdf]

|                 |                  |                 |                  |                 |                 |                 |
|-----------------|------------------|-----------------|------------------|-----------------|-----------------|-----------------|
| 1               | 16               | 31              | 46               | 61              | 76              |                 |
| -----           | -----            | -----           | -----            | -----           | -----           | -GTTCTACTGGGACC |
| -----           | -----            | -----           | -----            | -----           | -----           | RACE            |
| GGTCTCTGTCTCATC | ACCTCTCTAGCCAGG  | CCCTTTCTGTTCCCT | G TTCACAAAGTGCTC | TCTGGTCAGTTTCTC | AGTCCTGTTGGGATT | hEST BG390932   |
|                 |                  |                 |                  |                 |                 | h1B2 genomic    |
| 91              | 106              | 121             | 136              | 151             | 166             |                 |
| TGGAGGAGTGAAGGC | AGGGGCCAAAGAGGA  | AGTTGTCCCCTCTTG | GGGGCCCTGGGGCTC  | CCGGGG-TCAGGATT | TTGATACTCTGAAGC | RACE            |
| -----A-GGAAGG   | CAGGGCCAAAGAGGA  | AGTTGTCCCCTCTTG | GGGGCCCTGGGGCTC  | CTGGGGGTCAGGATT | TTGATACTCTGAAGC | hEST BG390932   |
| TGGAAGAG-GAAGTT | GGGGGTTC AAGAGGG | AGTTGTTCCCTAGTA | AGGGCCCTTGTGC-C  | CTGGGG-TCAGCCTT | TTGATACTTTGAAGT | h1B2 genomic    |
| 181             | 196              | 211             | 226              | 241             | 256             |                 |
| AGGAAACTTTGATTC | CCATGGCAAACCCTG  | TTCCTGTTCAGAGGA | G-----           | -----           | -----           | RACE            |
| AGGAAACTTTGATTC | CCATGGCAAACCCTG  | TTCCTGTTCAGAGGA | GCCACCTCCAGGGCC  | CCATTCTCAGGCTGC | GCTACATGGTGAAGC | hEST BG390932   |
| AGGGAACTTTGATTT | CCATGGCAAACCCTG  | TTCCTGTTCAGAGGA | GCCACCTCCAGGGCC  | CCATCCTCAGGCTGC | GCTACATGGTGAAGC | h1B2 genomic    |
|                 | M A N P V        | P V Q R S       | H L Q G P        | I L R           |                 |                 |
