# Supplementary material
Source: PubMed Central journal article supplement (PMC544304)

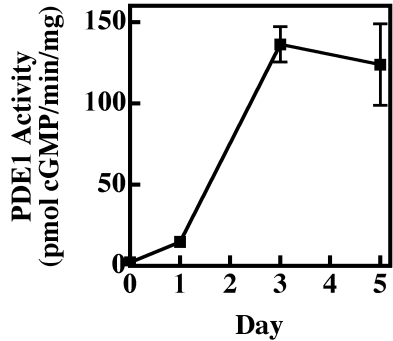

Supplement: pnas_102_2_497__2.pdf [file pnas_102_2_497__2.pdf]

A

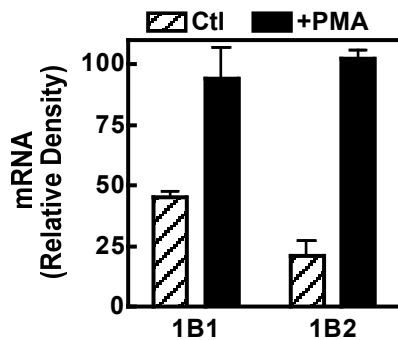

B

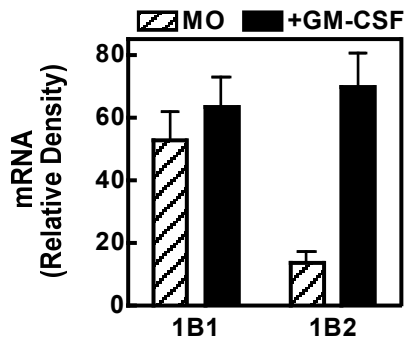

Supplement: pnas_102_2_497__3.pdf [file pnas_102_2_497__3.pdf]

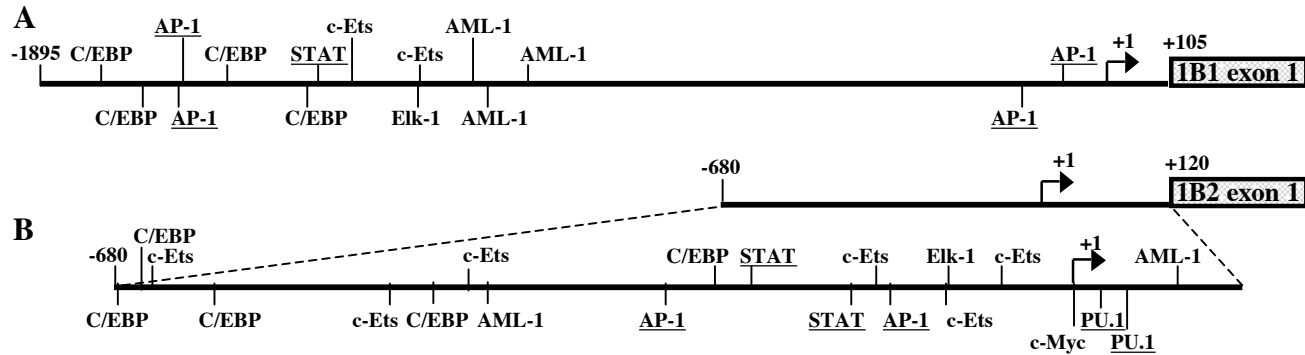

Supplement: pnas_102_2_497__5.pdf [file pnas_102_2_497__5.pdf]
